# Supplementary material
Source: PubMed Central journal article supplement (PMC8446822)
Supplement: mmc1.pdf [file mmc1.pdf]

## SURVEY ON HEALTH ISSUES IN FAITH COMMUNITIES

To respond to this survey in Spanish, please click on the arrow below.

If you have questions about this survey, contact:

Thank you for agreeing to take part in this survey about health issues, which should take around 15 minutes to complete. As part of this effort, the survey includes questions about your opinions and experiences in relation to the global health pandemic caused by the novel coronavirus (also known as COVID-19). Please answer these questions to the best of your ability. We thank you for your important contribution.

If you do not know how to respond to a question, please leave it blank. Be assured that your responses are confidential. If you have any questions or comments, contact \_\_\_\_\_ . Please do not respond to this survey more than once.

Please tell us the name and city of the faith community that sent you this survey (e.g., \_\_\_\_\_): \_\_\_\_\_

We would first like to learn how you are doing these days.

Thinking about your life today overall, please answer the following questions about yourself on a scale of 0-10:

Overall, how satisfied are you with life as a whole these days?

Not Satisfied at All

Completely Satisfied

In general, how happy or unhappy do you usually feel?

Extremely Unhappy

Extremely Happy

In general, how would you rate your physical health?

Poor

Excellent

How would you rate your overall mental health?

Poor

Excellent

Overall, to what extent do you feel the things you do in your life are worthwhile?

Not at All Worthwhile

Completely Worthwhile

I understand my purpose in life.

Strongly Disagree

Strongly Agree

I always act to promote good in all circumstances, even in difficult and challenging situations.

Not True of Me

Completely True of Me

I am always able to give up some happiness now for greater happiness later.

Not True of Me

Completely True of Me

I am content with my friendships and relationships.

Strongly Disagree

Strongly Agree

My relationships are as satisfying as I would want them to be.

Strongly Disagree

Strongly Agree

How often do you worry about being able to meet normal monthly living expenses?

Worry All of the Time

Do Not Ever Worry

How often do you worry about safety, food, or housing?

Worry All of the Time

Do Not Ever Worry

In this section, we would like to ask about your current religious commitments. Please note that when we ask about your faith community in the following questions, we mean the local organization (i.e., church, temple, mosque, etc.) that sent you this survey.

How long have you attended this faith community?

- 1 year or less
- 2-4 years
- 5-9 years
- 10-19 years
- 20 or more years

Aside from weddings, funerals, and religious holidays, about how often did you normally attend religious services at your faith community before the COVID-19 pandemic started?

- A few times a year or less
- Once a month
- 2-3 times a month
- Once a week
- Several times a week

Since the COVID-19 pandemic started, has your faith community offered online religious services?

- Yes
- No
- I don't know

In the past two months, how often did you attend online religious services?

- Never
- Once a month or less
- 2-3 times a month
- Once a week
- Several times a week

In the past two months, how often did you attend in-person religious services at your faith community?

- Never
- Once a month or less
- 2-3 times a month
- Once a week
- Several times a week
- My faith community is not currently offering in-person services

Once the COVID-19 pandemic is over, which of the following would describe you best?

- I will most likely attend in-person religious services only
- I will most likely attend online religious services only
- I will most likely attend a mix of online and in-person religious services
- I will most likely not attend religious services at all

Outside of religious services, about how often do you spend time alone *praying or meditating these days*?

- Never
- Only on rare occasions

Once a week or less  
A few times a week  
Once a day  
Several times a day

Outside of religious services, about how often do you spend time alone *reading sacred texts or scriptures*?

Never  
A few times a year  
Once a month  
2-3 times a month  
About once a week  
Several times a week or more

How important is your religious faith in your everyday life?

Not at all important  
Not too important  
Somewhat important  
Very important  
My religious faith is the most important thing in my life

Overall, how have the following changed (if at all) since the COVID-19 pandemic started?

**Decreased since the pandemic**

**Same as before the pandemic**

**Increased since pandemic**

How often you pray or meditate  
How often you read sacred texts or scriptures  
How often you attend religious services  
How important your religious faith is to you in your everyday life  
The sense of connection or closeness you feel towards your local faith community

Please rate the extent to which you agree or disagree with the following statements about God.

**Strongly disagree**

**Disagree**

**Agree**

**Strongly agree**

**I don't believe in God**

God is concerned with the wellbeing of the world  
God is concerned with my personal wellbeing  
I feel that God is generally responsive to me  
When good or bad things happen to me, I see them as part of God's plan for me  
I depend on God for help and guidance  
God seems impersonal to me

We would now like to ask some questions about the kinds of support your local faith community (i.e., the organization that sent you this survey) provides.

Please rate how much you agree or disagree with the following statements in general:

**Strongly disagree**

**Disagree**

**Agree**

**Strongly agree**

**No opinion**

I feel connected to my faith community.

I trust the leaders of my faith community.

I feel very close to the leaders of my faith community.

I feel very close to other members of my faith community.

There are members of my faith community who would take the time to talk over my problems if I needed to.

When I am around other members of my faith community, I can completely relax and be myself.

Members of my faith community really care about each other.

In general, how often do members of your faith community do the following?

**Never**

**Once in a while**

**Fairly often**

**Very often**

Let you know they love and care for you

Talk with you about your private problems and concerns

Express interest and concern in your well-being

Provide meals and other practical support for members who are sick or injured

Provide meals and other practical support for members struggling with mental health issues

Does your faith community normally provide counseling services (e.g. support groups, pastoral counseling, etc.)?

Yes

No

I'm not sure

Does your faith community normally provide a referral list of counseling services outside of the church, such as hotline numbers or contact information of mental health professionals?

Yes

No

I'm not sure

Have leaders or staff members from your faith community ever referred you to a mental health professional (e.g. psychiatrist, psychologist, social worker, counselor, etc.)?

Yes

No

Have leaders or staff members from your faith community ever discouraged you from seeking help from a mental health professional (e.g. psychiatrist, psychologist, social worker, counselor, etc.)?

Yes

No

Since the Coronavirus pandemic started, has your local faith community been doing any of the following? (Please select all that apply; leave it blank if it does not apply or if you don't know)

My faith community has been in regular contact with members

My faith community leaders have made themselves easy to access (by phone, online consultations, etc.)

My faith community has helped elderly members to stay connected

My faith community has offered members help with financial difficulties, food, or other material needs

My faith community leaders have talked about mental health

My faith community has started, promoted, or continued online support groups for mental health

My faith community has provided or suggested external resources for mental health needs (e.g., counselors, therapists)

My faith community has provided help (e.g., money, food, etc.) to people outside our faith community

My faith community has made members aware of local opportunities for COVID-19 testing

How did your faith community respond to the national protests following George Floyd's killing? (Please select all that apply; leave it blank if it does not apply or if you don't know)

My faith community leaders spoke or wrote about the need for racial justice

My faith community leaders encouraged us to participate in protests for racial justice

My faith community leaders addressed the stress or trauma caused by the event

My faith community leaders organized prayer services for racial justice

My faith community leaders expressed support for the police

My faith community leaders criticized violent protests

Members of my faith community participated in protests for racial justice

Members of my faith community organized discussions about racial justice

There are disagreements among my faith community members about race relations in America

We would like to learn how your life has been affected by the COVID-19 pandemic

Please tell us whether any of the following situations have happened to you, personally, in the past calendar year. Please leave it blank if it does not apply to you.

Yes, before March 2020

Yes, since March 2020

A serious accident or injury

A serious illness

An unexpected death of a loved one  
Trouble with the law  
A robbery or break-in  
Physical assault or mugging  
A marital separation or divorce  
Domestic violence  
Trouble with drug/alcohol addiction  
An unwanted loss of a job  
Considerable loss of income  
Considerable loss of financial savings  
Loss of health insurance  
Going out of business

Currently, how difficult is it for you to meet the following needs?

Not at all difficult  
Not too difficult  
Somewhat difficult  
Very difficult  
Housing  
Food  
Transportation  
Medical expenses  
Other necessities  
Non-essential expenses

Please indicate whether any of the following statements apply to you. Please select all that apply, and leave it blank if it does not apply to you:

I currently have symptoms of COVID-19, but I have not yet been tested  
I was diagnosed with COVID-19 and my health still suffers because of it  
I had COVID-19 and I have successfully recovered  
I have a health condition (e.g., heart disease, lung disease, etc.) that puts me at high risk for COVID-19  
Someone living in my household has a health condition (e.g., heart disease, lung disease, etc.) that puts them at high risk for COVID-19  
Someone close to me has been diagnosed with COVID-19  
Someone close to me has died due to COVID-19  
I regularly worry about becoming sick with COVID-19  
I regularly worry that my family or friends will become sick with COVID-19  
Since the COVID-19 pandemic, I feel more isolated from the people I care about  
Since the COVID-19 pandemic, I have needed help with finances, food, or other material needs  
Since the COVID-19 pandemic, my faith community helped me with finances, food, or other material needs  
I have helped people in my faith community during the COVID-19 pandemic  
I have donated money or food during the COVID-19 pandemic  
I am unhappy with my faith community's response to the COVID-19 pandemic  
Since the COVID-19 pandemic, the quality of my sleep has worsened  
I have medical issues that have gone untreated due to COVID-19 restrictions

Since the COVID-19 pandemic, my sense of purpose in life has weakened  
Since the COVID-19 pandemic, I often feel lonely  
Since the COVID-19 pandemic, I often feel helpless  
Since the COVID-19 pandemic started, I have needed specialized mental health services (e.g., psychiatrists, therapists, counselors)  
Since the COVID-19 pandemic, I have been unable to access specialized mental health services (e.g., psychiatrists, therapists, counselors)  
Because of the COVID-19 pandemic, my mental health has worsened  
I believe that the COVID-19 pandemic is a punishment from God  
I believe that the COVID-19 pandemic is caused by the devil or evil spirits  
I believe that the COVID-19 pandemic is a sign that the world is ending  
I believe that the COVID-19 pandemic has created a unique opportunity for expressing compassion to others

How often in the past 30 days have you felt any of the following ways?

**Never**

**Rarely**

**Sometimes**

**Often**

**Almost always**

Trembling and shaky

Worried over possible misfortunes

Your muscles were tense

Could not control your thoughts

Like the worst was going to happen

Butterflies in your stomach

Dizzy or lightheaded

Like you were missing out on things in life

That you had to keep busy to avoid unpleasant thoughts

Bothered by things that usually do not bother you

Lack of appetite

That you could not "shake off the blues"

That everything you did was an effort

Hopeless about the future

Unable to keep your mind on what you were doing

So sad that nothing could cheer you up

Like you could not "get going"

Shortness of breath or trouble breathing

Numbness or tingling in parts of your body

Sweaty but not due to heat or exercise

That life is ultimately meaningless

Angry

Like you were "boiling up inside"

Outraged by something somebody had said or done

Unable to control your temper

Difficulty forgiving people who have angered you

That you could not stop thinking about everything that makes you angry



That you wanted to “get back” at someone who had angered you

Since the COVID-19 pandemic, has your use of the following changed?

**Increased**

**Decreased**

**Stayed about the same**

I do not use it

Alcohol

Tobacco

Pornography

Prescription medications for depression, insomnia, or any other type of mental illness?

Marijuana

Non-prescription drugs

In the next section, we would like to ask about some of your general opinions on various matters:

If a loved one was experiencing a mental illness and was threatening to harm themselves or others, what would you do? (Select all that apply)

I would call 911

I would call the police

I would call a mental illness crisis line

I would consult a religious leader from my faith tradition

I would consult a doctor

I would consult a therapist or mental health professional

I would consult a family member

I would consult a friend

Other [include text entry box]

Which of the above options would you turn to first?

I would call 911

I would call the police

I would call a mental illness crisis line

I would consult a religious leader from my faith tradition

I would consult a doctor

I would consult a therapist or mental health professional

I would consult a family member

I would consult a friend

Other [previous text entry box contents]

To what extent do you think the protests in response to George Floyd’s death were necessary?

I do not think the protests were necessary at all

I think the protests were somewhat necessary

I think the protests were very necessary

Not sure

In general, to what extent do you trust the following people?

**Completely**

**Quite a lot**

**A little**

**Not at all**

Journalists

Police officers

The current US president

Politicians (from the party I support)

Politicians (from the party I do not support)

Religious leaders from my faith tradition

Pharmaceutical companies

Scientists

Medical doctors

Mental health professionals (e.g., psychiatrists, counselors)

Thinking about yourself, how much do you agree or disagree with each of the following statements about the Coronavirus or COVID-19?

**Do not agree**

**Agree a little**

**Agree moderately**

**Agree a lot**

**Agree completely**

I trust the information about the virus from scientific experts

I trust the information about the virus from the media

COVID-19 is a bioweapon developed by China

COVID-19 is a hoax

Social distancing reduces the likelihood of spreading the virus from person to person

Until we have a COVID-19 vaccine, citizens should be required to wear face masks in public places like grocery stores

The COVID-19 related lockdowns were justified

Generally speaking, do you usually think of yourself as a Democrat, a Republican, an Independent, or other?

Democrat

Republican

Independent

Other party

No preference

How much do you agree or disagree with each of the following statements?

**Strongly disagree**

**Disagree**

**Agree**

**Strongly agree**

Don't know

Having a mental health disorder is nothing to be ashamed of

People with mental health disorders can live normal lives

People with serious mental health disorders are usually a danger to society

People with mental health disorders are welcomed in my faith community

Suicide can often be prevented

People should not be ashamed to say a loved one died by suicide

Suicide is a selfish act

If my loved one died by suicide, I would keep quiet about the cause of death

If a vaccine to prevent COVID-19 were available today, would you...

Definitely get the vaccine

Probably get the vaccine

Probably NOT get the vaccine

Definitely NOT get the vaccine

We thank you again for your continued participation. You are almost done! In this next and final section, we would like to ask some basic questions about your personal background. Please keep in mind that your responses are entirely anonymous and confidential, so feel free to answer as openly and honestly as possible.

What is your gender?

Female

Male

Other:

Prefer not to say

With what race/ethnicity do you *most closely* identify?

Hispanic or Latino

White

Black or African American

Asian/Asian American

Native American

Other

What is your current age in years?

What is your current marital status?

Married

Domestic partnership/living with partner (not legally married)

Separated  
Divorced  
Widowed  
Single/never been married

What is the highest level of schooling you have completed?

Less than high school  
High school graduate (GED or diploma)  
Some college (including Associate's degree and vocational training)  
College graduate (Bachelor's degree)  
Postgraduate or professional degree (e.g. MA, MS, PhD, MD, JD)

What is your current employment status?

Employed full-time  
Employed part-time  
Unemployed but seeking employment  
Unemployed and not seeking employment  
Retired  
Homemaker  
Sick leave  
Maternity leave  
Other

Were you born in the United States of America?

Yes  
No

Do you have any chronic physical health conditions (e.g. asthma, diabetes, etc.)?

Yes  
No

Have you ever been diagnosed with a mental illness by a medical professional or psychologist (e.g. clinical depression, anxiety disorder, bipolar disorder, etc.)?

Yes  
No

By your best estimate, what was your total household income last year, before taxes? By total household income, we mean the total salaries for all of the people living in your home plus all other sources of income (e.g. pensions, real estate, social security, etc.).

Less than \$10,000  
More than \$250,000

Finally, what is the biggest challenge you are currently facing that you would like your faith community leaders to know?

You have reached the end of this survey. If you are ready to submit your response, click the “next” arrow below.

Thank you for taking the survey!

Your response has been recorded.

To learn more about work conducted at            please visit:

If you are currently in emotional distress and do not have a health professional or religious leader who is able to help you, please call the SAMHSA Treatment Referral helpline at 1-877-726-4727, which is staffed live from 8 a.m. to 8 p.m. EST Monday to Friday.

If the emergency is more urgent and/or life-threatening, please call 911, available 24 hours a day.
