# Supplementary material
Source: PubMed Central journal article supplement (PMC8446822)
Supplement: mmc2.pdf [file mmc2.pdf]

Table 3. Nested logistic regression models of anticipated COVID-19 vaccine acceptance among religious populations (N=1,070). Congregation-level clustered standard errors.

| Variables                                                             | Model 1                  | Model 2                   | Model 3                   |
|-----------------------------------------------------------------------|--------------------------|---------------------------|---------------------------|
| Race: African American (ref. White)                                   | 0.19**<br>(0.05 - 0.66)  | 0.19**<br>(0.05 - 0.67)   | 0.19*<br>(0.05 - 0.72)    |
| Race: Hispanic (ref. White)                                           | 0.38***<br>(0.24 - 0.61) | 0.35***<br>(0.27 - 0.46)  | 0.58*<br>(0.38 - 0.90)    |
| Race: Asian American (ref. White)                                     | 1.21<br>(0.55 - 2.66)    | 1.45<br>(0.62 - 3.39)     | 1.24<br>(0.57 - 2.73)     |
| Race: Other (ref. White)                                              | 0.48+<br>(0.22 - 1.03)   | 0.59<br>(0.29 - 1.19)     | 0.69<br>(0.36 - 1.32)     |
| Trust in COVID-19 information from scientists (binary)                |                          | 7.59***<br>(3.59 - 16.05) | 6.97***<br>(3.24 - 15.01) |
| Worrying about COVID-19 (binary)                                      |                          | 1.42<br>(0.74 - 2.72)     | 1.59<br>(0.83 - 3.04)     |
| Frequency of prayer (1-4 scale)                                       |                          | 0.79**<br>(0.68 - 0.92)   | 0.83**<br>(0.73 - 0.93)   |
| Gender: Men (ref. Women)                                              |                          |                           | 2.64***<br>(1.58 - 4.40)  |
| Age in years (continuous)                                             |                          |                           | 0.93*<br>(0.88 - 0.99)    |
| Age squared (interaction term)                                        |                          |                           | 1.00**<br>(1.00 - 1.00)   |
| Marital status: Married or in partnership (ref. Not married)          |                          |                           | 1.25<br>(0.92 - 1.70)     |
| Household income (1-4 scale)                                          |                          |                           | 1.24**<br>(1.08 - 1.42)   |
| Education: College degree or higher (ref. Less than a college degree) |                          |                           | 1.53<br>(0.89 - 2.62)     |
| Self-rated physical health (0-10 scale)                               |                          |                           | 1.06<br>(0.99 - 1.14)     |
| Political party: Republican or Independent (ref. Democrat)            |                          |                           | 0.54*<br>(0.29 - 1.00)    |
| Observations                                                          | 1,070                    | 1,070                     | 1,070                     |
| AIC                                                                   | 940                      | 833                       | 782                       |
| BIC                                                                   | 965                      | 873                       | 852                       |
| Chi-squared (deviance)                                                | 930                      | 817                       | 754                       |

Exponentiated coefficients of the nested logistic regressions (models 1-3) that represent the odds ratios of vaccine acceptance. 95% confidence intervals of the odds ratios are shown in parentheses. Congregation-level (n=12) clustered standard errors have been employed for the calculation of the statistics.

Age, age squared, the frequency of prayer (originally ordinal), household income (originally ordinal) and self-rated physical health are treated as continuous variables. All other variables are employed as factors using binary/dummy codings.

Statistical significance at the 95% level: \*\*\* p<0.001, \*\* p<0.01, \* p<0.05, + p<0.1
